# Supplementary material for: Use of Machine Perfusion to Increase the Number of Expanded Criteria Deceased Donor Kidney Transplants: A Pharmacoeconomic Analysis
Source: PubMed Central journal article supplement (PMC11230806; doi:10.1097/txd.0000000000001668), 2024-07-05
Supplement: txd-10-e1668-s001.pdf [file txd-10-e1668-s001.pdf]

**Table S1.** Annual probabilities of patient death and graft loss after kidney transplantation.

| Year after kidney transplantation | Death |       | Death-censored graft loss |       |
|-----------------------------------|-------|-------|---------------------------|-------|
|                                   | ECD   | SCD   | ECD                       | SCD   |
| 1                                 | 7.14% | 4.11% | 14.98%                    | 6.62% |
| 2                                 | 4.23% | 2.42% | 7.37%                     | 5.18% |
| 3                                 | 3.82% | 2.67% | 7.50%                     | 5.27% |
| 4                                 | 4.38% | 2.94% | 9.09%                     | 5.98% |
| 5                                 | 4.15% | 2.42% | 10.00%                    | 4.11% |

Adapted from the systematic review and meta-analysis<sup>17</sup>.

ECD: expanded criteria donor; SCD: standard criteria donor.

**Table S2.** Costs of recovery and transportation of deceased donor kidneys.

| <b>Preparation</b>                                                                                | <b>Cost (USD)</b> |
|---------------------------------------------------------------------------------------------------|-------------------|
| Evaluation of potential deceased organ and tissue donors for transplantation                      | 40                |
| Clinical evaluation of brain death in children over 2 years                                       | 40                |
| ABO blood typing in potential organ donors                                                        | 3                 |
| Complementary exams for brain death diagnosis                                                     | 111               |
| Daily ICU cost of a potential organ donor                                                         | 94                |
| <b>Interview</b>                                                                                  |                   |
| Interview with the family of a brain-dead potential organ donor in preparation for organ donation | 78                |
| <b>Surgery Center</b>                                                                             |                   |
| Hemodynamic management of the possible donor and cost of the operating room for organ recovery    | 167               |
| Coordination of the operating room for organ and tissue recovering for transplantation            | 74                |
| <b>Recovery</b>                                                                                   |                   |
| Unilateral or bilateral kidney extraction for transplant - deceased donor                         | 217               |
| Kidney preservation solution                                                                      | 65                |
| <b>Effective donors</b>                                                                           |                   |
| Number of organs recovered and transplanted organs: maximum of 06 per donor                       | 48                |
| Interstate displacement of professional staff for organ recovery                                  | 167               |
| <b>Total cost</b>                                                                                 | <b>1,104</b>      |

**Table S3.** Cost of using the machine perfusion according to manufacturer's pricing information.

| <b>Parameters</b>                       | <b>Cost (USD)</b> |
|-----------------------------------------|-------------------|
| Acquisition, per machine                | 16,000            |
| Operation, per kidney                   | 2,252             |
| Perfusion Circuit                       | 2,000             |
| KPS1 perfusion fluid                    | 180               |
| Disposable cannula                      | 60                |
| Recovery of the deceased donor kidneys* | 1,040             |

\*Estimated microcosting described in Table Supplemental Table 2, excluding the cost of the preservation solution.

**Table S4.** Annual hemodialysis microcosting per patient per year.

| <b>Parameters</b>                             | <b>Annual cost (USD)</b> |
|-----------------------------------------------|--------------------------|
| Hemodialysis (maximum of 3 sessions per week) | 5,837                    |
| Exams                                         | 100                      |
| Venous access                                 | 152                      |
| Drugs                                         | 1,453                    |
| Visits                                        | 22                       |
| Hospitalizations                              | 219                      |
| <b>Total cost</b>                             | <b>7,783</b>             |

**Table S5.** Range of the parameters in the sensitivity analysis.

| <b>Parameters</b>                         | <b>Mean</b> | <b>Distribution</b> | <b>Minimum</b> | <b>Maximum</b> |
|-------------------------------------------|-------------|---------------------|----------------|----------------|
| Mean age, years                           | 50          | Gama                | 40             | 60             |
| Discount, %                               | 0.05        | Beta                | 0.00           | 0.10           |
| Proportion of kidney transplants from ECD | 0.19        | Beta                | 0.17           | 0.21           |
| Death on the waiting list                 | 0.08        | Beta                | 0.07           | 0.09           |
| Machine perfusion cohort                  |             |                     |                |                |
| Kidney transplants from ECD               | 0.88        | Beta                | 0.79           | 0.97           |
| Kidney transplants from SCD               | 0.88        | Beta                | 0.79           | 0.97           |
| Cold storage cohort                       |             |                     |                |                |
| Kidney transplants from ECD               | 0.62        | Beta                | 0.56           | 0.68           |
| Kidney transplants from SCD               | 0.88        | Beta                | 0.79           | 0.97           |
| Machine perfusion preservation cost       | 3.292       | Log-normal          | 2.962          | 3.621          |
| Cold static preservation cost             | 1.105       | Log-normal          | 994            | 1.215          |
| Kidney transplant cost                    | 8.254       | Log-normal          | 7.429          | 9.080          |
| Hemodialysis cost                         | 7.782       | Log-normal          | 7.004          | 8.561          |
| Follow-up cost                            | 2.716       | Log-normal          | 2.444          | 2.987          |
| Perfusion machine price                   | 16.000      | Log-normal          | 14.400         | 17.600         |
| Number of machines purchased - Year 1     | 10          | Gama                | 0              | 20             |
| Number of machines purchased - Year 2     | 10          | Gama                | 0              | 20             |
| Number of machines purchased - Year 3     | 10          | Gama                | 0              | 20             |
| Number of machines purchased - Year 4     | 10          | Gama                | 0              | 20             |
| Number of machines purchased - Year 5     | 10          | Gama                | 0              | 20             |

Assumption of  $\pm 10\%$ . All values are in USD.

**Table S6.** Univariate sensitivity analysis of the cost-effectiveness per transplant performed.

| <b>Parameter</b>                                     | <b>Minimum Value</b> | <b>Average</b> | <b>Maximum Value</b> | <b>Variation</b> |
|------------------------------------------------------|----------------------|----------------|----------------------|------------------|
| % of expanded criteria transplants without perfusion | -22,471              | 3,994          | -804                 | 47.857439%       |
| % standard transplants without perfusion             | -804                 | 3,994          | -22,471              | 47.857439%       |
| % standard transplants employing perfusion           | 6,952                | 3,994          | 2,532                | 1.334539%        |
| Dialysis cost                                        | 2,460                | 3,994          | 6,489                | 1.109246%        |
| Transplant cost                                      | 5,984                | 3,994          | 2,004                | 1.082475%        |
| Perfusion operational cost                           | 2,880                | 3,994          | 5,108                | 0.339227%        |
| % expanded criteria transplants employing perfusion  | 3,169                | 3,994          | 4,820                | 0.186217%        |
| Follow-up cost                                       | 3,337                | 3,994          | 4,651                | 0.117924%        |
| Discount                                             | 3,527                | 3,994          | 4,437                | 0.056474%        |
| % death on the waiting list                          | 4,258                | 3,994          | 3,731                | 0.018961%        |
| Static organ preservation cost                       | 3,740                | 3,994          | 4,244                | 0.017370%        |
| Mean age                                             | 3,852                | 3,994          | 4,137                | 0.005546%        |
| Number of machines purchased - Year 1                | 3,861                | 3,994          | 4,127                | 0.004817%        |
| Number of machines purchased - Year 2                | 3,874                | 3,994          | 4,114                | 0.003944%        |
| Number of machines purchased - Year 3                | 3,880                | 3,994          | 4,109                | 0.003577%        |
| Number of machines purchased - Year 4                | 3,935                | 3,994          | 4,114                | 0.002186%        |
| Perfusion machine price                              | 4,057                | 3,994          | 3,943                | 0.000892%        |
| Number of machines purchased - Year 5                | 3,938                | 3,994          | 4,051                | 0.000874%        |
| % of organ with expanded criteria                    | 3,938                | 3,994          | 4,050                | 0.000851%        |

All values are in USD.

**Table S7.** Univariate sensitivity analysis of the cost-effectiveness per avoided dialysis.

| <b>Parameter</b>                                     | <b>Minimum Value</b> | <b>Average</b> | <b>Maximum Value</b> | <b>Variation</b> |
|------------------------------------------------------|----------------------|----------------|----------------------|------------------|
| % of expanded criteria transplants without perfusion | -27,928              | 5,505          | -1,087               | 47.348449%       |
| Transplant cost                                      | -1,087               | 5,505          | -27,928              | 47.348449%       |
| % standard transplants employing perfusion           | 9,582                | 5,505          | 3,490                | 1.571917%        |
| Dialysis cost                                        | 3,391                | 5,505          | 8,945                | 1.306550%        |
| % standard transplants without perfusion             | 8,249                | 5,505          | 2,762                | 1.275017%        |
| Perfusion operational cost                           | 3,970                | 5,505          | 7,041                | 0.399566%        |
| % expanded criteria transplants employing perfusion  | 4,283                | 5,505          | 6,967                | 0.305316%        |
| Follow-up cost                                       | 4,368                | 5,505          | 6,643                | 0.219340%        |
| Discount                                             | 4,600                | 5,505          | 6,411                | 0.138900%        |
| % death on the waiting list                          | 5,060                | 5,505          | 5,961                | 0.034338%        |
| Number of machines purchased - Year 4                | 5,869                | 5,505          | 5,142                | 0.022334%        |
| Number of machines purchased - Year 3                | 5,309                | 5,505          | 5,702                | 0.006533%        |
| Mean age                                             | 5,386                | 5,505          | 5,752                | 0.005675%        |
| Static organ preservation cost                       | 5,322                | 5,505          | 5,688                | 0.005674%        |
| Number of machines purchased - Year 1                | 5,340                | 5,505          | 5,671                | 0.004646%        |
| Number of machines purchased - Year 2                | 5,348                | 5,505          | 5,663                | 0.004214%        |
| % of organ with expanded criteria                    | 5,592                | 5,505          | 5,435                | 0.001051%        |
| Number of machines purchased - Year 5                | 5,427                | 5,505          | 5,583                | 0.001030%        |
| Perfusion machine price                              | 5,429                | 5,505          | 5,582                | 0.001003%        |

All values are in USD.

**Table S8.** Univariate sensitivity analysis of the cost-effectiveness per death avoided.

|                                                      | <b>Minimum Value</b> | <b>Average</b> | <b>Maximum Value</b> | <b>Variation</b> |
|------------------------------------------------------|----------------------|----------------|----------------------|------------------|
| % of expanded criteria transplants without perfusion | -82,690              | 37,393         | -5,882               | 41.67811%        |
| % standard transplants without perfusion             | -5,882               | 37,393         | -82,690              | 41.67811%        |
| % standard transplants employing perfusion           | 65,083               | 37,393         | 23,707               | 4.94800%         |
| Dialysis cost                                        | 23,030               | 37,393         | 60,751               | 4.11270%         |
| Transplant cost                                      | 56,025               | 37,393         | 18,761               | 4.01344%         |
| Perfusion operational cost                           | 26,963               | 37,393         | 47,823               | 1.25774%         |
| % expanded criteria transplants employing perfusion  | 29,088               | 37,393         | 47,323               | 0.96106%         |
| Follow-up cost                                       | 29,665               | 37,393         | 45,121               | 0.69043%         |
| Discount                                             | 31,243               | 37,393         | 43,543               | 0.43722%         |
| Static organ preservation cost                       | 39,859               | 37,393         | 34,927               | 0.07030%         |
| Mean age                                             | 40,151               | 37,393         | 35,308               | 0.06780%         |
| % death on the waiting list                          | 36,059               | 37,393         | 38,727               | 0.02056%         |
| Number of machines purchased - Year 1                | 36,150               | 37,393         | 38,636               | 0.01786%         |
| Number of machines purchased - Year 2                | 36,268               | 37,393         | 38,518               | 0.01462%         |
| Number of machines purchased - Year 3                | 36,322               | 37,393         | 38,464               | 0.01326%         |
| Number of machines purchased - Year 4                | 36,808               | 37,393         | 38,582               | 0.00910%         |
| Perfusion machine price                              | 37,981               | 37,393         | 36,912               | 0.00331%         |
| Number of machines purchased - Year 5                | 36,864               | 37,393         | 37,923               | 0.00324%         |
| % of organ with expanded criteria                    | 36,871               | 37,393         | 37,916               | 0.00316%         |

All values are in USD.



Figure S1

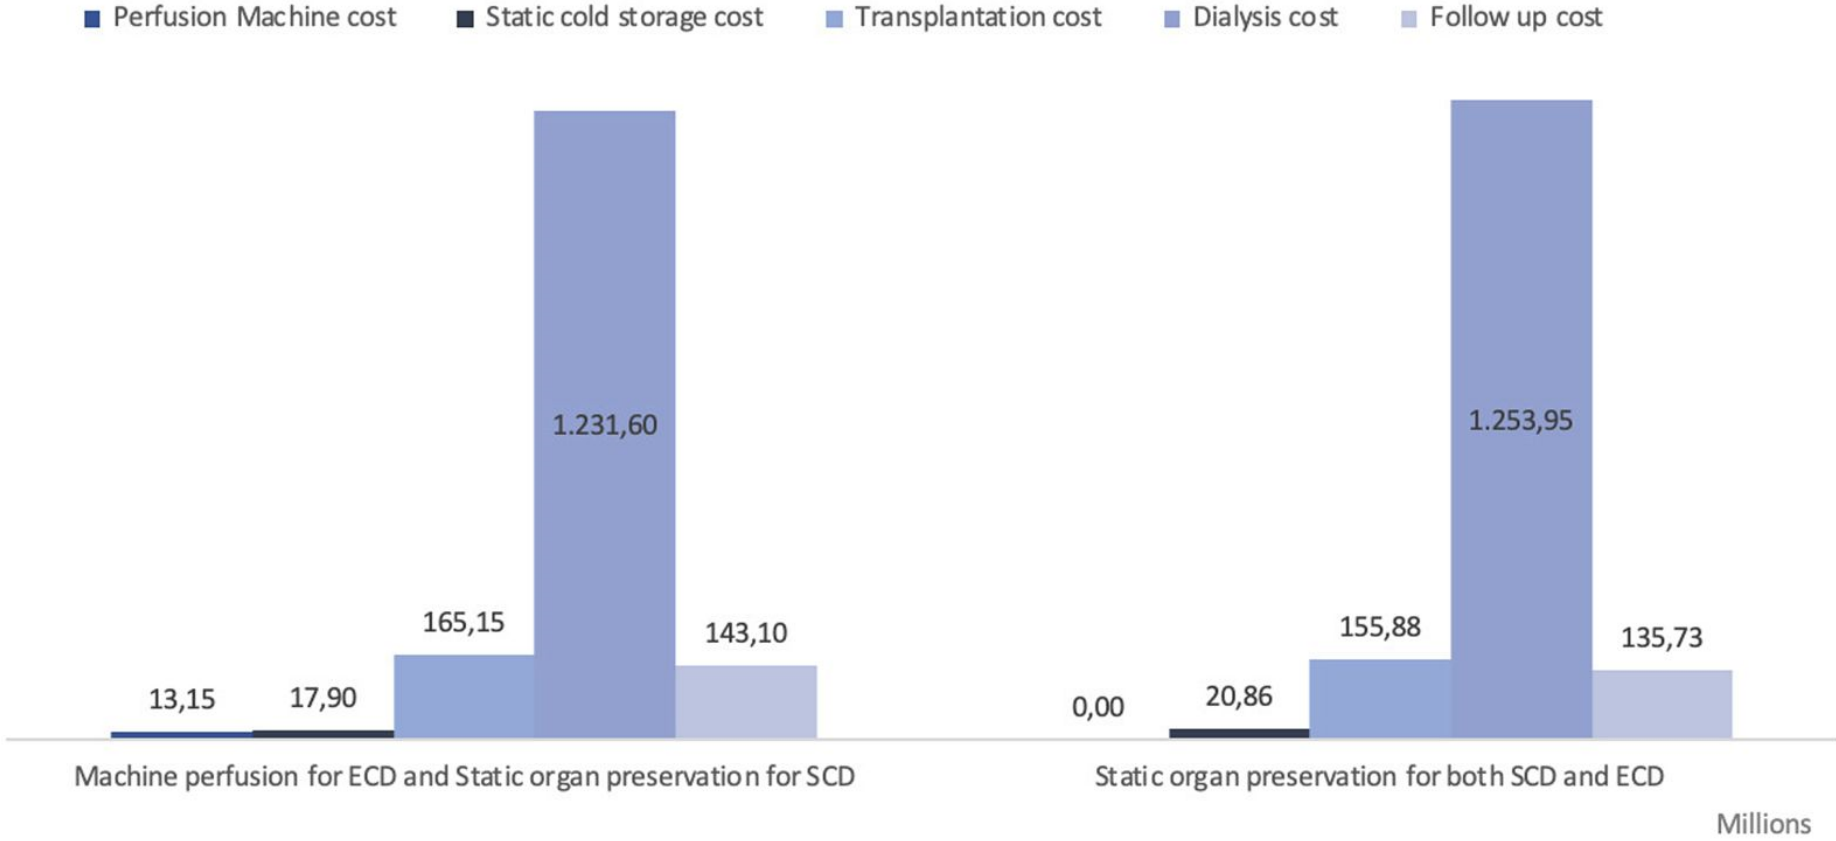

Figure S2

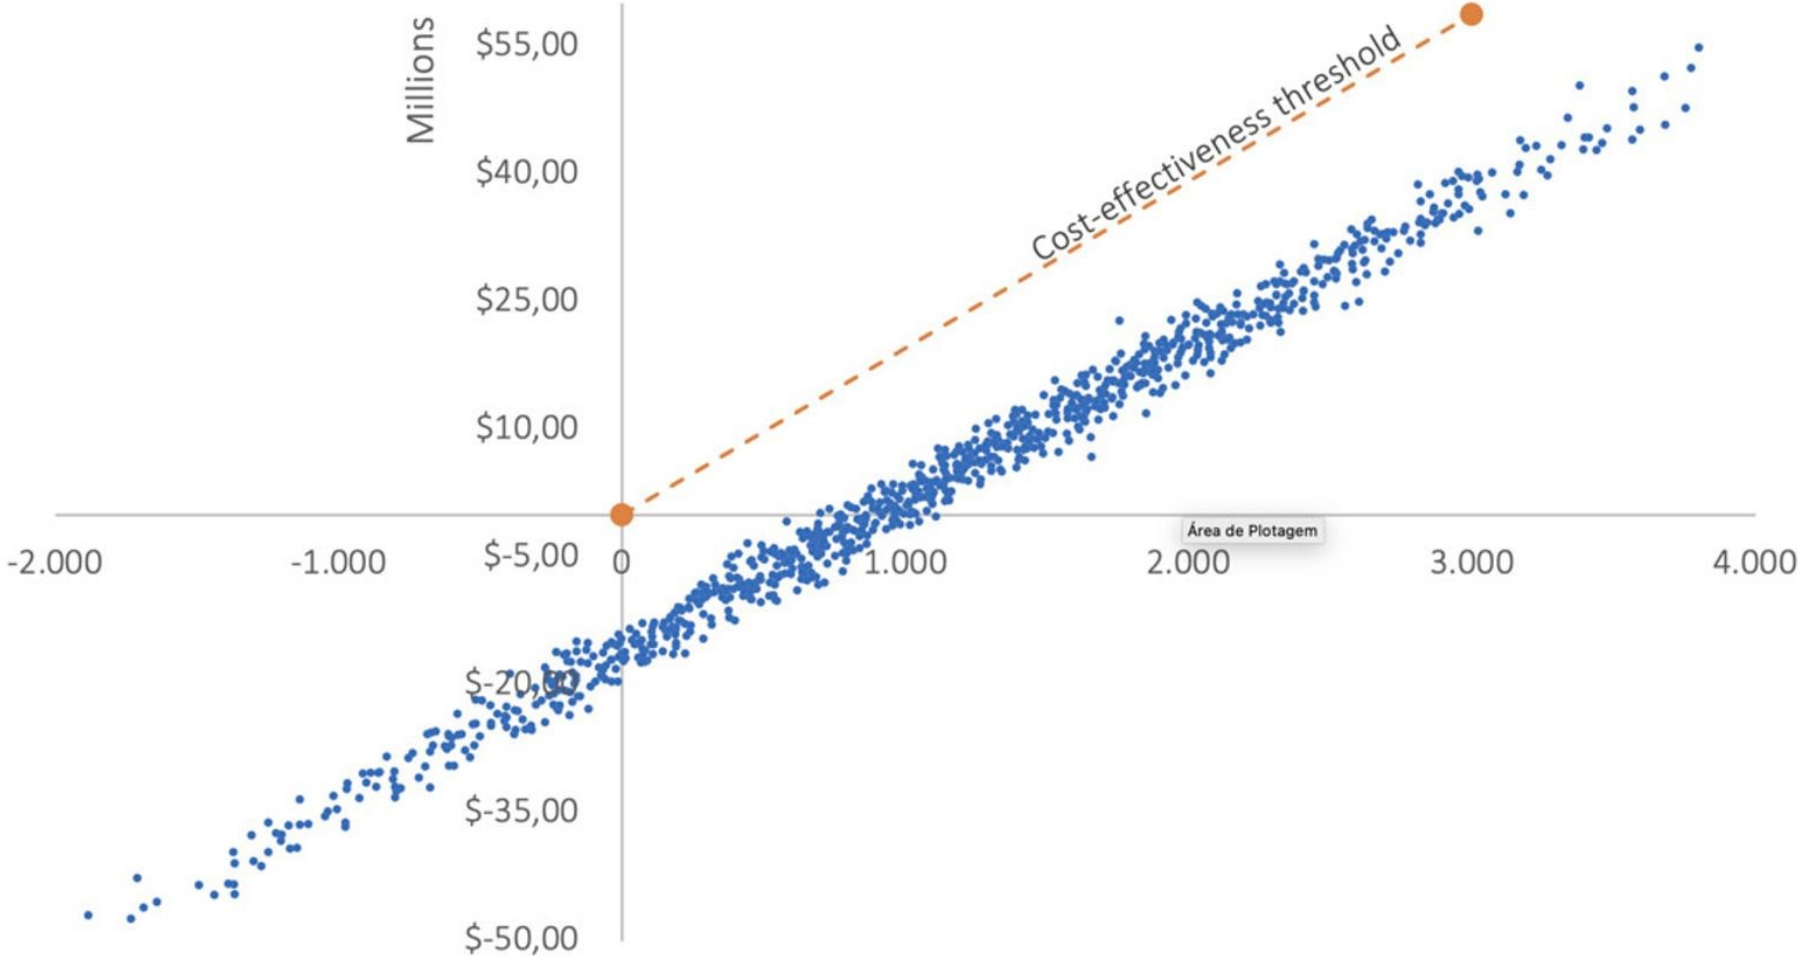

Figure S3

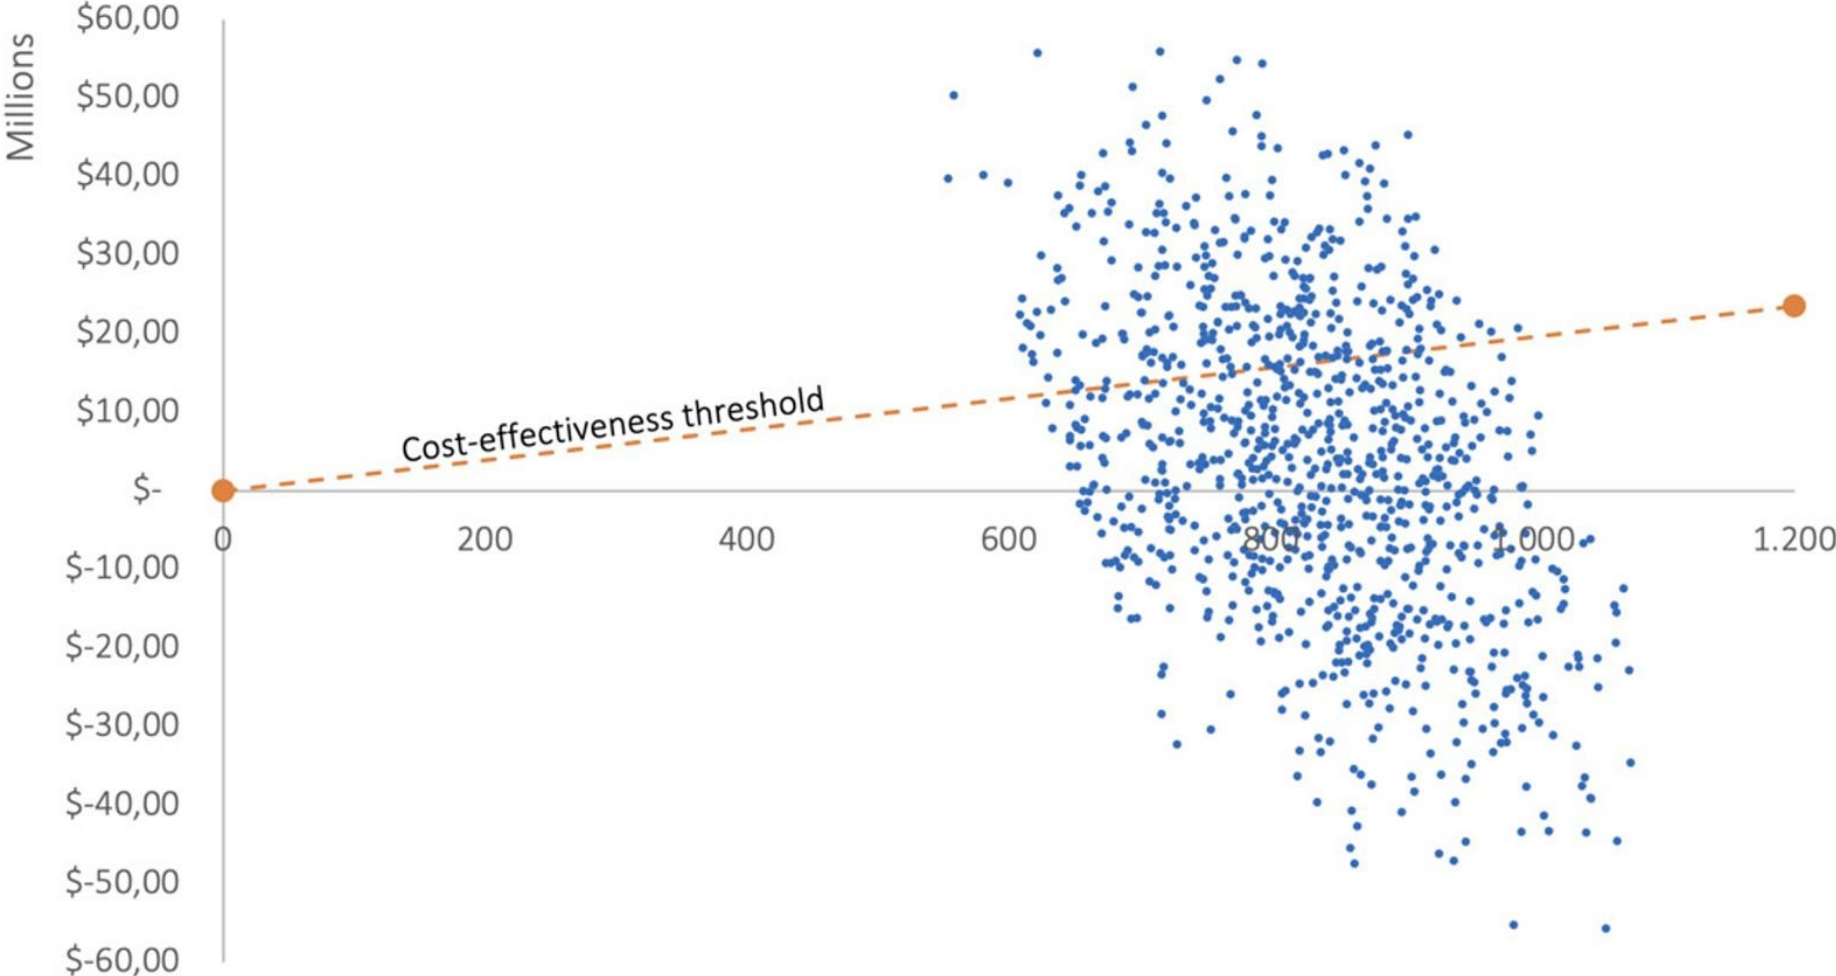

Figure S4

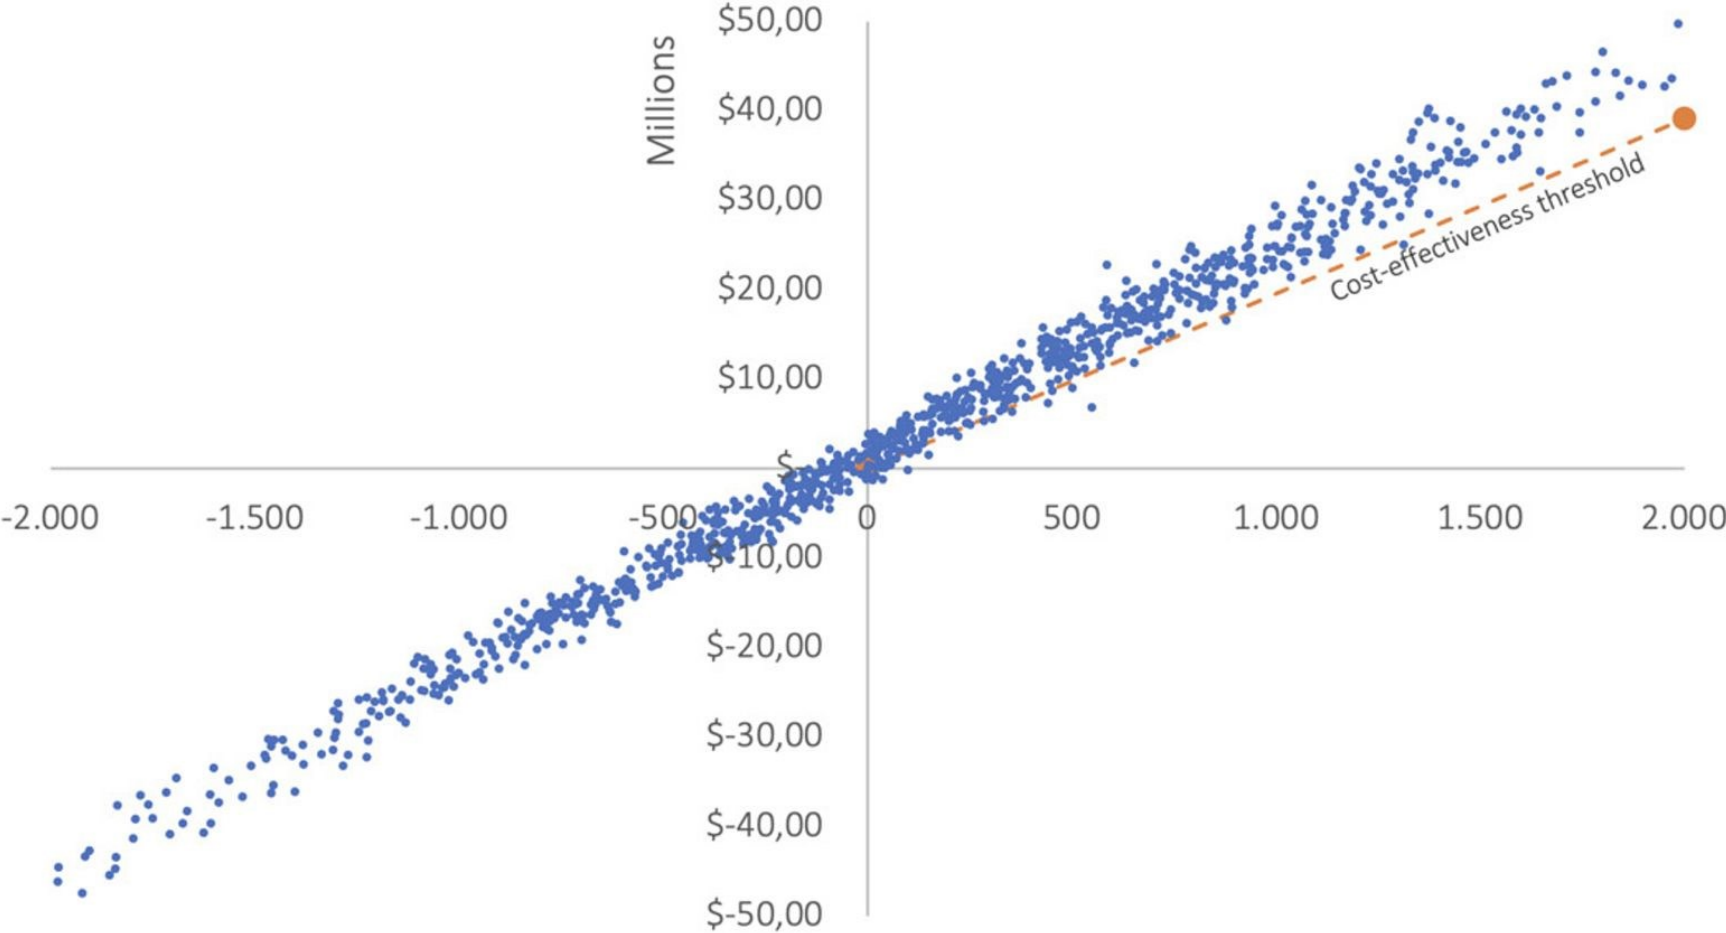

## **FIGURE LEGEND**

**Figure S1.** Distribution of costs according to procedures.

**Figure S2.** Probabilistic sensitivity analysis of cost-effectiveness per transplant performed.

**Figure S3.** Probabilistic sensitivity analysis of the cost-effectiveness per dialysis avoided.

**Figure S4.** Probabilistic sensitivity analysis of the cost-effectiveness per death avoided.
